# Supplementary material for: Mesoporous boron nitride and boron-nitride-carbon materials from mesoporous silica templates
Source: Royal Society of Chemistry journal article supplement (doi:10.1039/b713740k), 2007-11-19
Supplement: b713740k.pdf [file b713740k.pdf]

***Supplementary Information***

**Mesoporous boron nitride and boron nitride carbon materials from  
mesoporous silica templates**

Ben Rushton, and Robert Mokaya\*

*School of Chemistry, University of Nottingham, University Park, Nottingham, NG7 2RD, UK.*

*r.mokaya@nottingham.ac.uk*

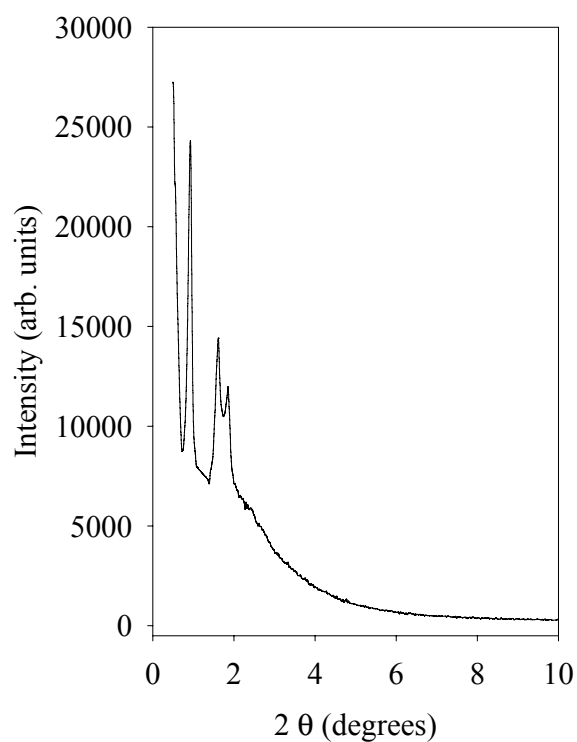

Supplementary Figure S1. Powder XRD pattern of calcined mesoporous silica SBA-15.

Low angle XRD was used to ascertain the long-range ordering of the arrangement of pores in the calcined mesoporous silica SBA-15. Three peaks, corresponding to the (100), (110) and (200) reflections are observed, thus confirming  $p6mm$  symmetry. The  $d$  spacing of the silica is 95.8 Å corresponding to a unit cell parameter,  $a_o$ , of 110.6 Å.

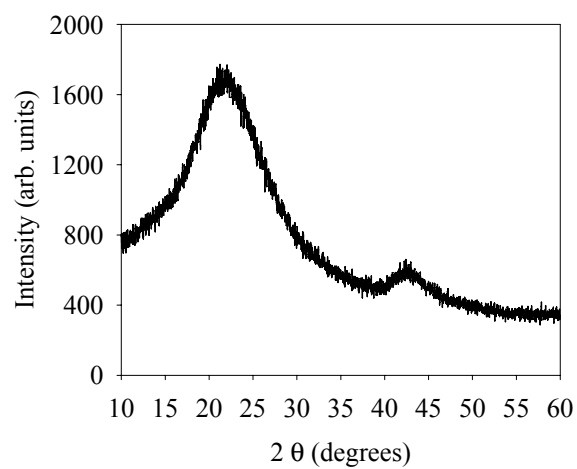

Supplementary Figure S2. High angle XRD pattern of SBA-15/BH<sub>3</sub>.NH<sub>3</sub> after 6 hours of CVD.

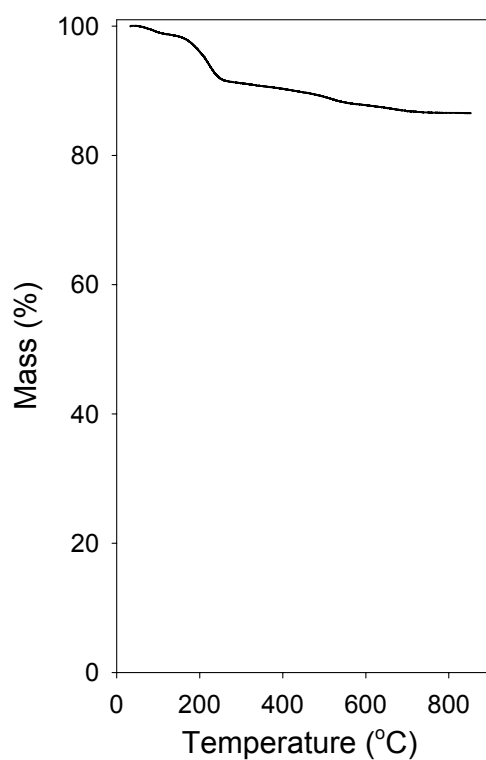

Supplementary Figure S3. Thermogravimetric analysis (TGA) curve for sample BNs.

The main mass loss event is the desorption of water (ca. 7 wt%) below 200 °C. The BNs sample remains stable up to temperatures above 900 °C.
